# Supplementary material for: Epi-Impute: Single-Cell RNA-seq Imputation via Integration with Single-Cell ATAC-seq
Source: MDPI journal article supplement (doi:10.3390/ijms24076229), 2023-03-25
Supplement: s1 [file s1]

## Supplementary Information

**Table S1.** Data sets analysed in the current study.

| Data Type                | Organism             | Source                           | Link                                                                                                                                                                              |
|--------------------------|----------------------|----------------------------------|-----------------------------------------------------------------------------------------------------------------------------------------------------------------------------------|
| scRNA-seq + scATAC-seq   | <i>Gallus gallus</i> | Williams R. M. et al. (2019)     | <a href="https://www.ncbi.nlm.nih.gov/geo/query/acc.cgi?acc=GSE131688">https://www.ncbi.nlm.nih.gov/geo/query/acc.cgi?acc=GSE131688</a>                                           |
| scRNA-seq                | <i>Mus musculus</i>  | Schaum N. et al. (2018)          | <a href="https://tabula-muris.ds.czbiohub.org/">https://tabula-muris.ds.czbiohub.org/</a>                                                                                         |
| sci-ATAC-seq             | <i>Mus musculus</i>  | Cusanovich D. et al. (2018)      | <a href="http://atlas.gs.washington.edu/mouse-atac/">http://atlas.gs.washington.edu/mouse-atac/</a>                                                                               |
| scRNA-seq                | <i>Homo sapiens</i>  | Pellin D. et al. (2019)          | <a href="https://www.ncbi.nlm.nih.gov/geo/query/acc.cgi?acc=GSE117498">https://www.ncbi.nlm.nih.gov/geo/query/acc.cgi?acc=GSE117498</a>                                           |
| scATAC-seq               | <i>Homo sapiens</i>  | Buenrostro J. D. et al. (2018)   | <a href="https://www.ncbi.nlm.nih.gov/geo/query/acc.cgi?acc=GSE96772">https://www.ncbi.nlm.nih.gov/geo/query/acc.cgi?acc=GSE96772</a>                                             |
| scRNA-seq                | <i>Homo sapiens</i>  | 10X Genomics Portal              | <a href="https://support.10xgenomics.com/single-cell-gene-expression/datasets/2.1.0/pbmc8k">https://support.10xgenomics.com/single-cell-gene-expression/datasets/2.1.0/pbmc8k</a> |
| scRNA-seq                | <i>Homo sapiens</i>  | 10X Genomics Portal              | <a href="https://support.10xgenomics.com/single-cell-gene-expression/datasets/2.1.0/pbmc4k">https://support.10xgenomics.com/single-cell-gene-expression/datasets/2.1.0/pbmc4k</a> |
| scATAC-seq               | <i>Homo sapiens</i>  | 10X Genomics Portal              | <a href="https://support.10xgenomics.com/single-cell-atac/datasets/1.1.0/atac_v1_pbmc_10k">https://support.10xgenomics.com/single-cell-atac/datasets/1.1.0/atac_v1_pbmc_10k</a>   |
| scRNA-seq + scATAC-seq   | <i>Homo sapiens</i>  | Yost K.E. et al. (2019)          | <a href="https://www.ncbi.nlm.nih.gov/geo/query/acc.cgi?acc=GSE123814">https://www.ncbi.nlm.nih.gov/geo/query/acc.cgi?acc=GSE123814</a>                                           |
| scRNA-seq + scATAC-seq * | <i>Homo sapiens</i>  | Jason D.Buenrostro et al. (2018) | <a href="https://doi.org/10.1016/j.cell.2018.03.074">https://doi.org/10.1016/j.cell.2018.03.074</a>                                                                               |

\* not used in an aggregated dataset.

**Table S2.** Imputation methods used in the current study.

| Method     | Source                                   | Link                                                                                                                                                                        |
|------------|------------------------------------------|-----------------------------------------------------------------------------------------------------------------------------------------------------------------------------|
| SCRABBLE   | Tao Peng, et al. (2019)                  | <a href="https://genomebiology.biomedcentral.com/articles/10.1186/s13059-019-1681-8">https://genomebiology.biomedcentral.com/articles/10.1186/s13059-019-1681-8</a>         |
| MAGIC      | David van Dijk, et al. (2018)            | <a href="https://www.cell.com/cell/fulltext/S0092-8674(18)30724-4">https://www.cell.com/cell/fulltext/S0092-8674(18)30724-4</a>                                             |
| scImpute   | Wei Vivian Li, Jingyi Jessica Li. (2018) | <a href="https://www.nature.com/articles/s41467-018-03405-7">https://www.nature.com/articles/s41467-018-03405-7</a>                                                         |
| SAVER      | Mo Huang, et al. (2018)                  | <a href="https://www.nature.com/articles/s41592-018-0033-z">https://www.nature.com/articles/s41592-018-0033-z</a>                                                           |
| DrImpute   | Wuming Gong, et al.                      | <a href="https://bmcbioinformatics.biomedcentral.com/articles/10.1186/s12859-018-2226-y">https://bmcbioinformatics.biomedcentral.com/articles/10.1186/s12859-018-2226-y</a> |
| DCA        | Gökçen Eraslan, et al. (2019)            | <a href="https://www.nature.com/articles/s41467-018-07931-2">https://www.nature.com/articles/s41467-018-07931-2</a>                                                         |
| coupledNMF | Zhana Duren, et al. (2018)               | <a href="https://www.pnas.org/doi/full/10.1073/pnas.1805681115">https://www.pnas.org/doi/full/10.1073/pnas.1805681115</a>                                                   |
| Seurat V4  | -                                        | -                                                                                                                                                                           |

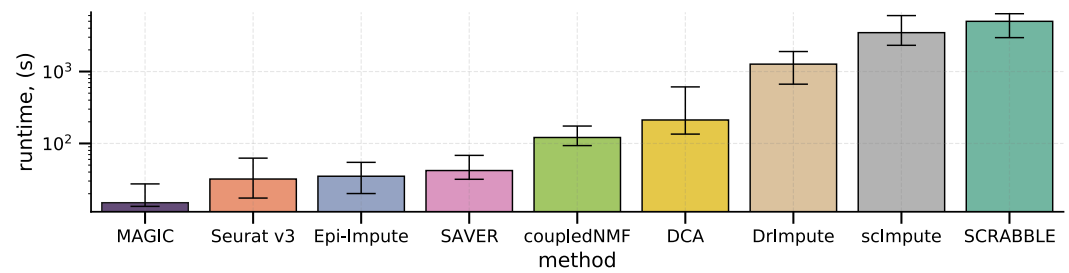

**Supplementary Figure S1.** Execution time spend on Pellin et al. (2019) dataset under the same conditions: 5 run per each method on 4 *Intel(R) Skylake Xeon(R) CPU E5-2620 v4 @ 2.10GHz* and 128GB *DIMM DDR4 Synchronous 2133 MHz*.

**Table S3.** List of cell-type-specific surface markers for the populations of analysed human hematopoietic progenitors [36].

| Acronym | Cell-Type                       | Positive Markers                                     | Negative Markers                                        |
|---------|---------------------------------|------------------------------------------------------|---------------------------------------------------------|
| HSC     | hematopoietic stem cell         | CD34(+)<br>CD90/THY1(+)<br>CD59(+)<br>CD49f/ITGA6(+) | Lineage*(-)<br>CD38(-)<br>CD45RA/PTPRC(-)               |
| CMP     | common myeloid progenitor       | CD34(+)<br>CD38(+)<br>CD135/FLT3(+)                  | Lineage*(-)<br>CD7(-)<br>CD10/MME(-)<br>CD45RA/PTPRC(-) |
| GMP     | granulocyte-monocyte progenitor | CD34(+)<br>CD38(+)<br>CD45RA/PTPRC(+)                | Lineage*(-)<br>CD7(-)<br>CD10/MME(-)<br>CD135/FLT3(-)   |

\* Lineage markers are CD15/FUT4(+), CD71/TFRC(+), CD41/ITGA2B(+) and CD19(+).

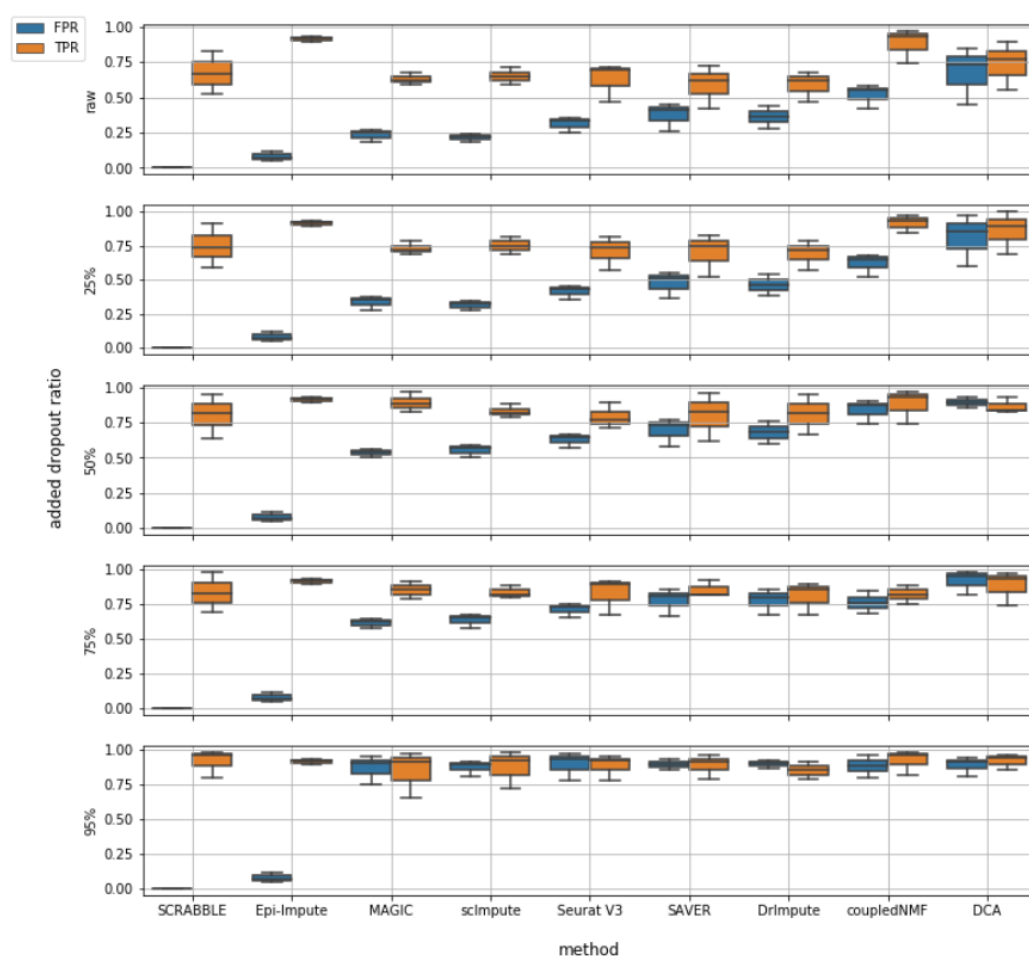

**Supplementary Figure S2.** True positive (*TPR*) and false positive rates (*FPR*) estimated based on bulk RNA-seq data. **(Top)** to **(bottom)**: *TPR* and *FPR* for each of the method tested on the series of data sets with given ratio of simulated drop-outs. Each boxplot denotes a distribution of the performance metric obtained across all cell types presented in the series of data sets.

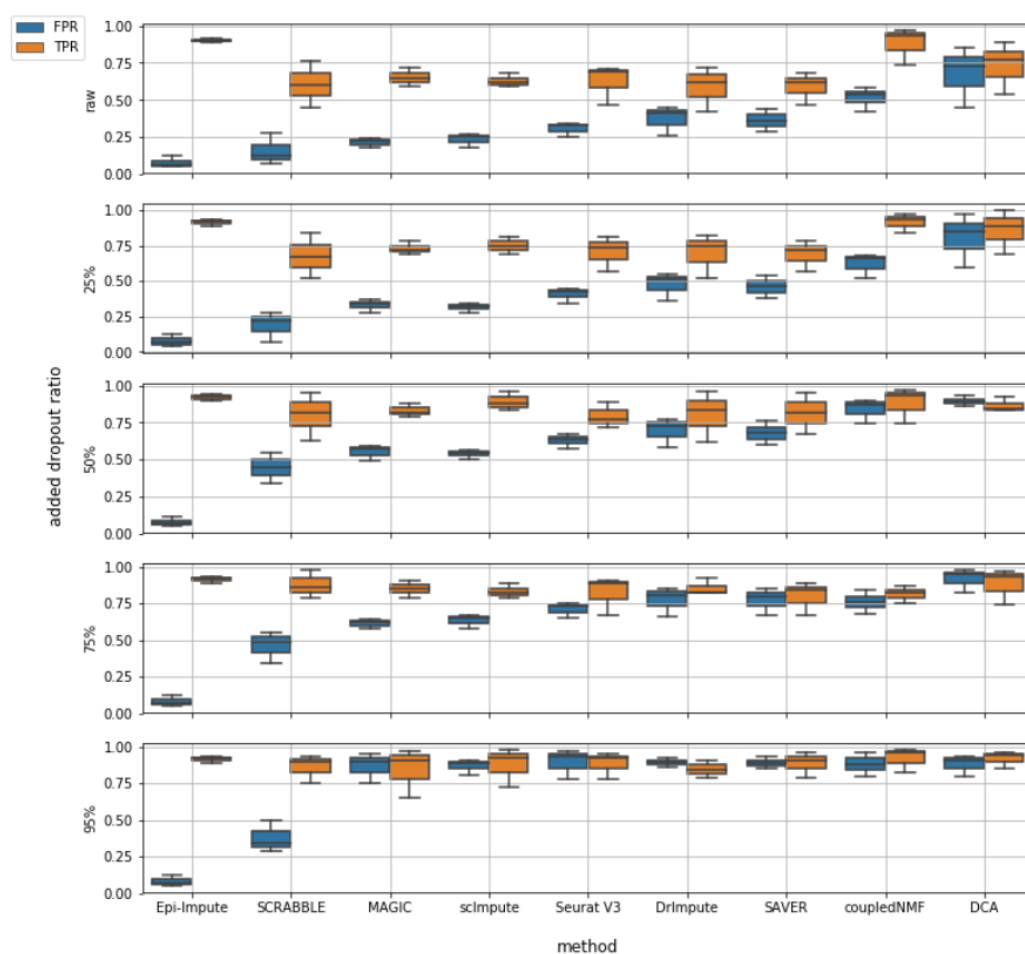

**Supplementary Figure S3.** True positive (*TPR*) and false positive rates (*FPR*) estimated based on the recovery of cell-type surface markers on an aggregated dataset, collected from Tabula Muris, PBMC 10x datasets and some GEO datasets. **(Top)** to **(bottom)**: *TPR* and *FPR* for each of the method tested on the series of data sets with given ratio of simulated drop-outs. Each boxplot denotes a distribution of the performance metric obtained across all cell types presented in the series of data sets.

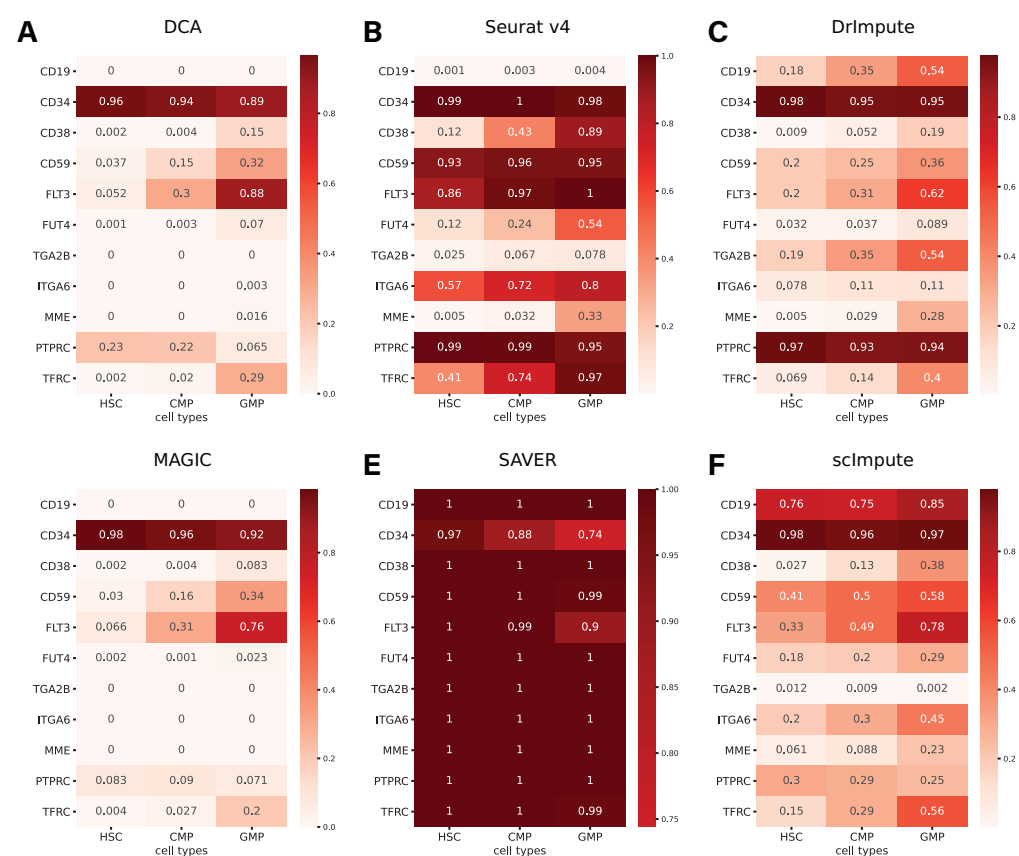

**Supplementary Figure S4.** A proportion of cells having an expression of known for hematopoiesis cell-type-specific surface markers after imputation of Pellin D. at el. (2019) dataset with various method: (A) DCA, (B) Seurat v4, (C) DrImpute, (D) MAGIC, (E) SAVER, (F) scImpute.

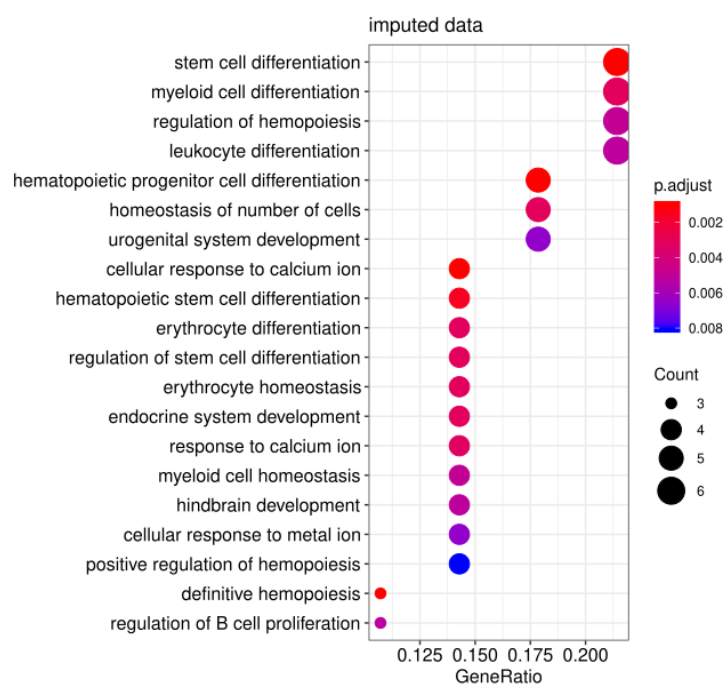

**Supplementary Figure S5.** GO Biological Process Enrichment for the most differentially expressed transcription factors in common myeloid progenitors (CMP).

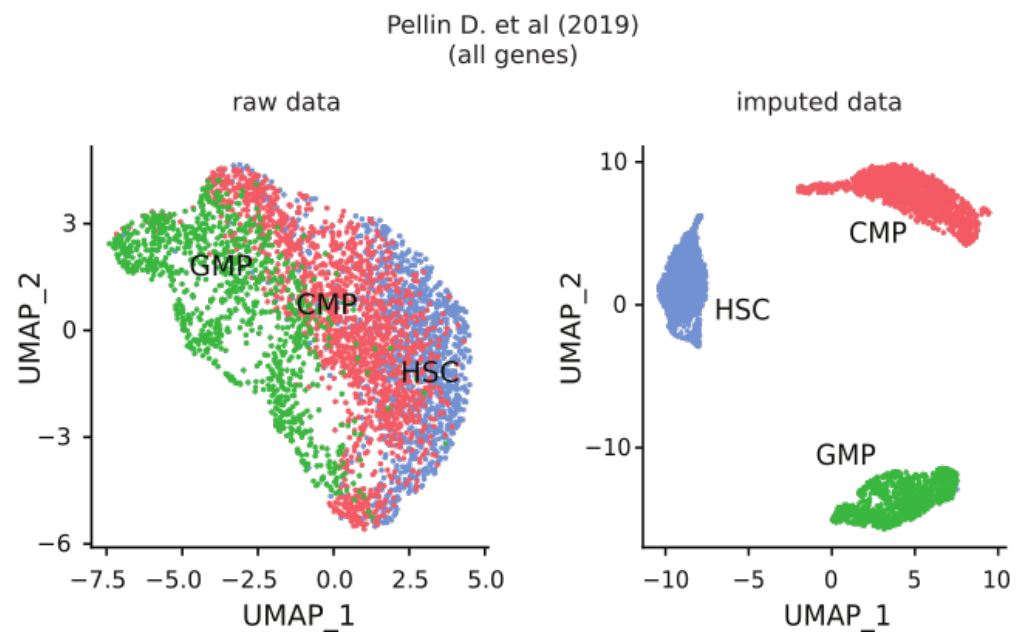

**Supplementary Figure S6.** UMAP clustering of all gene expression for raw data (**left**) and imputed with Epi-Impute (**right**).

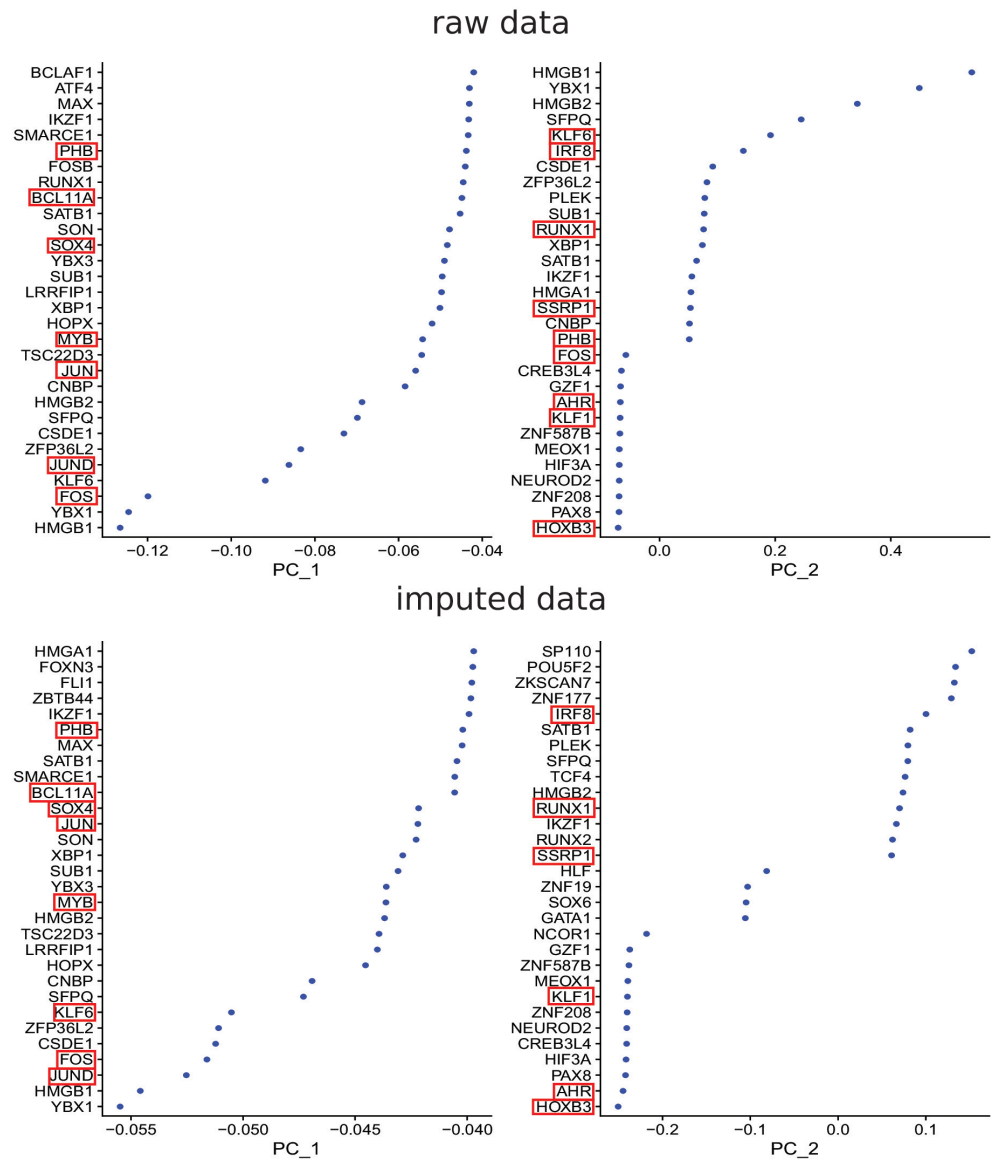

**Supplementary Figure S7.** PCA dimension loadings used for UMAP clustering of the transcription factors expression for raw data (**top**) and imputed with Epi-Impute (**bottom**). Genes which remained after imputation are marked with red.

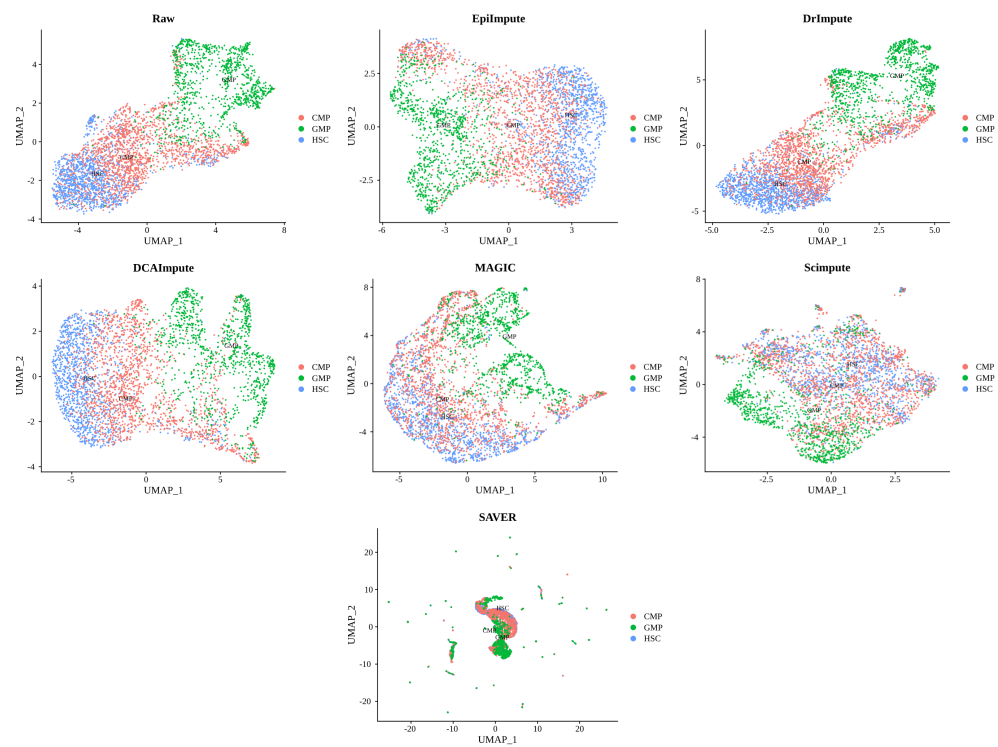

**Supplementary Figure S8.** UMAP clustering of six imputation methods and raw data for Jason D.Buenrostro et al. (2018) dataset.

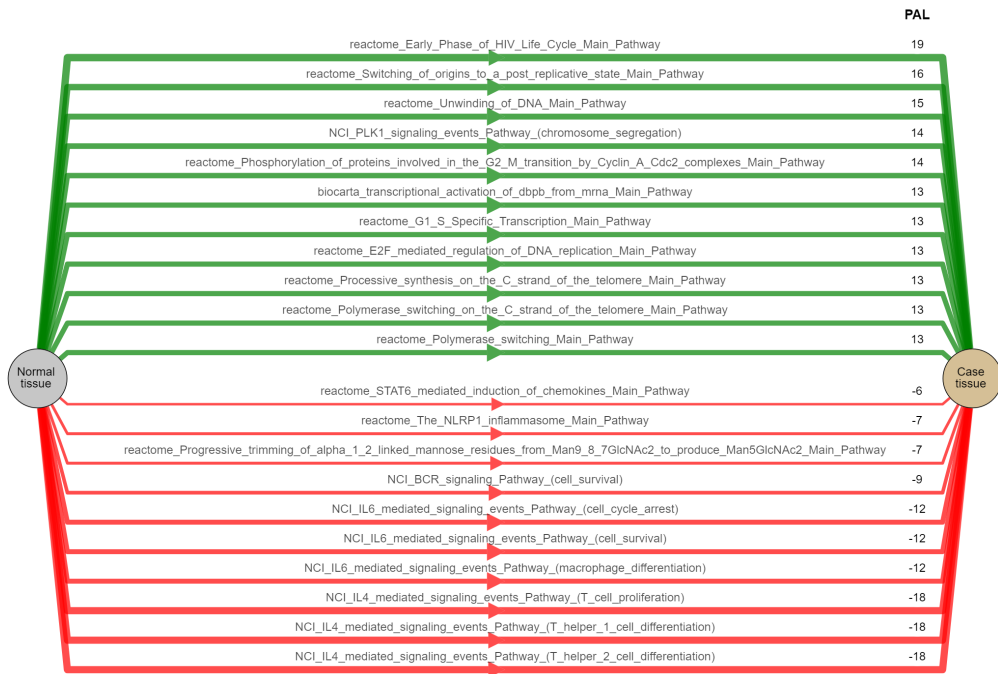

**Supplementary Figure S9.** PAL analysis of imputed cells via Epi-impute for a cluster 4 vs clusters 1+5 (Jason D.Buenrostro et al. (2018) dataset).



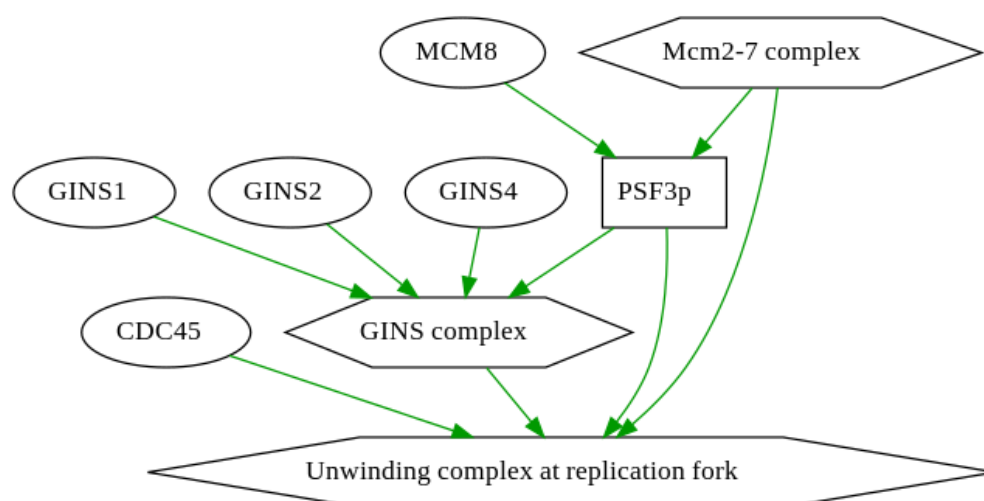

**Supplementary Figure S10.** Graphic scheme for “Reactome Unwinding of DNA\_Main Pathway”.

**Table S4.** Mean Silhouette Coefficient of six imputational methods and raw data for or Jason D.Buenrostro et al. (2018) dataset.

| Data       | Mean Silhouette Coefficient |
|------------|-----------------------------|
| Raw        | 0.0295                      |
| Epi-impute | 0.0285                      |
| Magic      | 0.0187                      |
| DrImpute   | 0.0191                      |
| DCA        | 0.0589                      |
| Saver      | 0.0043                      |
| ScImpute   | 0.0151                      |
